# Supplementary material for: NIR-II light triggered nitric oxide release nanoplatform combined chemo-photothermal therapy for overcoming multidrug resistant cancer
Source: Royal Society of Chemistry journal article supplement (doi:10.1039/d0tb02626c), 2021-01-01
Supplement: d0tb02626c1.pdf [file d0tb02626c1.pdf]

## **Supporting Information**

### **NIR-II Light Triggered Nitric Oxide Release Nanoplatfrom Combined Chemo-Photothermal Therapy for Overcoming Multidrug Resistance Cancer**

*Jin Wang,<sup>#</sup> Canchen Wu,<sup>#</sup> Xiru Qin, Youyou Huang, Jianan Zhang, Tingting Chen,  
Yang Wang,\* Yue Ding,\* Yong Yao\**

School of chemistry and chemical engineering, Nantong University, Nantong, Jiangsu  
226019, China.

E-mail: ywang85@ntu.edu.cn, yueding@ntu.edu.cn, yaoyong1986@ntu.edu.cn

<sup>#</sup>The authors contributed equally to the work.

## **1. Experimental Section**

### **1.1 Materials.**

Cetyltrimethyl ammonium bromide (CTAB), copper sulfate ( $\text{CuSO}_4 \cdot 5\text{H}_2\text{O}$ , 99%), Selenium dioxide ( $\text{SeO}_2$ , 99.9%), vitamin C (Vc), Doxorubicin (DOX) hydrochloride, Tetraethylorthosilicate (TEOS) and N-[3-(Trimethoxysilyl)propyl]ethylenediamine (AEAPTS), folic acid (FA), N-(3-Dimethylaminopropyl)-N'-ethylcarbodiimide hydrochloride (EDC, 97%) and N-hydroxysuccinimide (NHS, 98%) were obtained from Aladdin Chemistry Co. Ltd. (Shanghai, China). DAF-FM DA was acquired from Beyotime Biotechnology. Anti-P-gp antibody (ab129450, Abcam), Dulbecco's modified eagle medium (DMEM, PAA Laboratories), fetal bovine serum (FBS, PAA Laboratories), hoechst33342 (Ultra Pure, Aldrich), and methylthiazolyldiphenyl-tetrazolium bromide (MTT, Ultra Pure, Aldrich) were used as received. MCF-7 (a human breast carcinoma cell line) and MCF-7/ADR (a human breast MDR cancer cell line) were received from Shanghai Institute of Biochemistry and Cell Biology.

### **1.2 Characterization.**

Scanning electron microscopy (SEM) images were acquired on a ZEISS Gemini SEM 300. Transmission electron microscopy (TEM) observations were conducted on a FEI Talox F200X electron microscope at an acceleration voltage of 300 kV. The UV-Vis-NIR spectroscopy was recorded by using a Shimadzu UV3600 spectrophotometer. Super-resolution multiphoton confocal laserscanning microscopy (CLSM) was performed on a Leica TCS SP8 STED 3X instrument. The 808 nm and 1064 nm NIR irradiations were carried out by using a continuous wave diode laser (Changchun

Femtosecond Technology Co. Ltd., China). XRD was carried out by means of a Rigaku D/max-2550pc instrument with monochromatized CuK $\alpha$  radiation and a scanning step of 0.028.

## 2. Figures

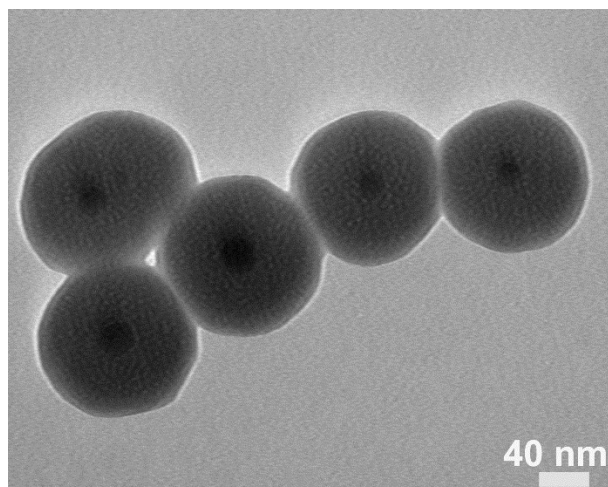

**Fig. S1** TEM image of  $\text{Cu}_{2-x}\text{Se}@\text{SiO}_2$  nanoparticles.

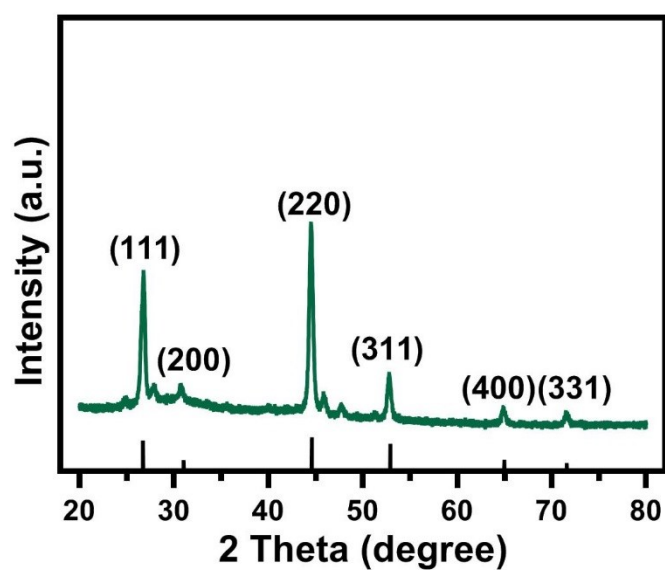

**Fig. S2** X-ray diffraction patterns of CSNPs.

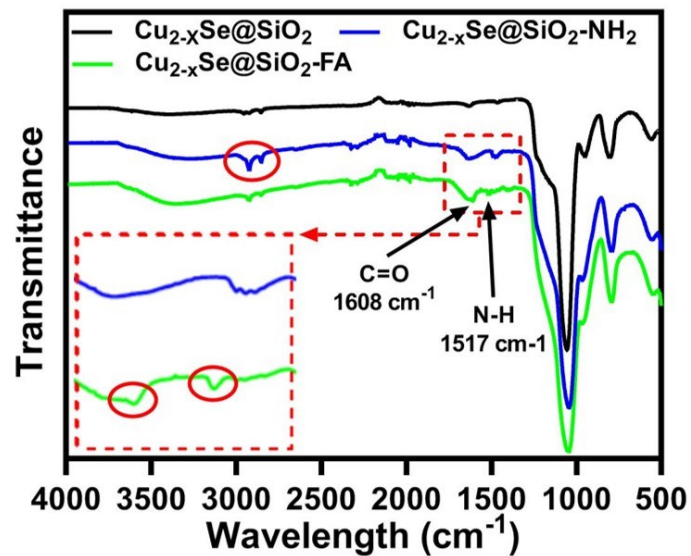

**Fig. S3** Fourier-transform infrared (FT-IR) spectra of  $\text{Cu}_{2-x}\text{Se}@ \text{SiO}_2$ ,  $\text{Cu}_{2-x}\text{Se}@ \text{SiO}_2\text{-NH}_2$  and  $\text{Cu}_{2-x}\text{Se}@ \text{SiO}_2\text{-FA}$ .

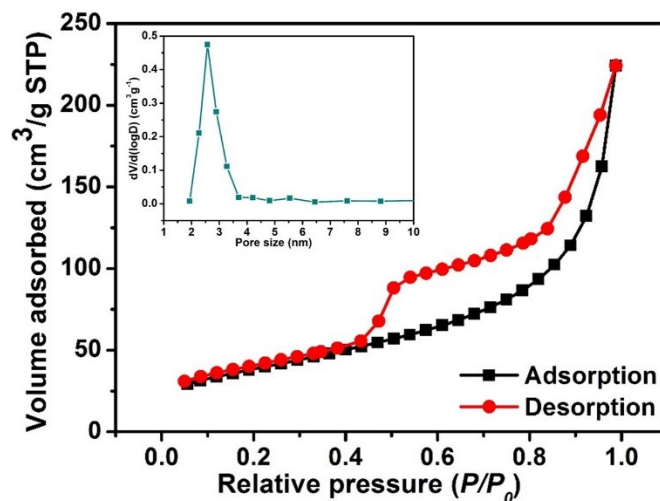

**Fig. S4** Nitrogen adsorption-desorption isotherms and pore diameter distributions (inset).of CSNPs.

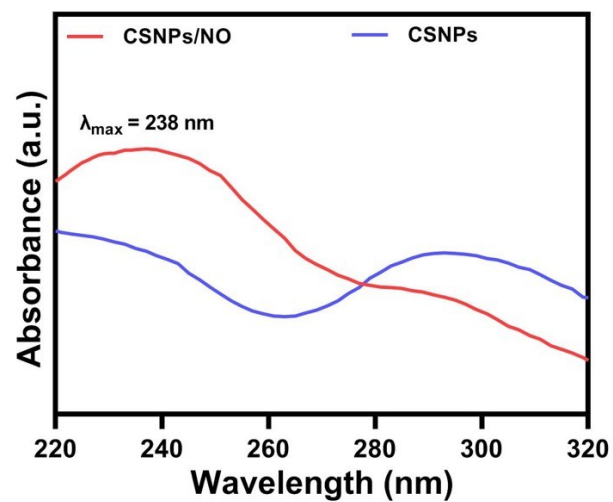

**Fig. S5** UV-vis absorbance spectra of CSNPs and CSNPs/NO aqueous solution.

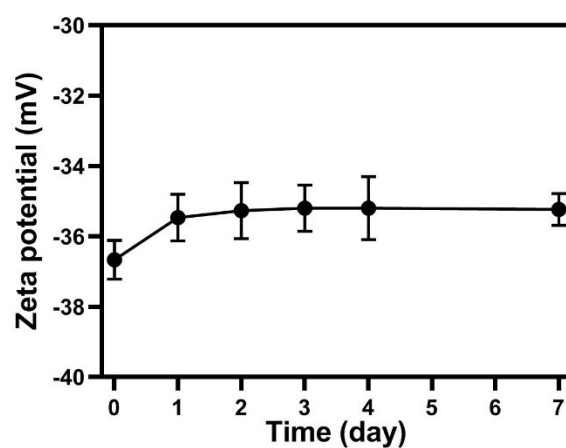

**Fig. S6** Zeta potential of CSNPs/NO after storage in PBS solution (pH = 7.4) at room temperature. (n = 3 for each time point)

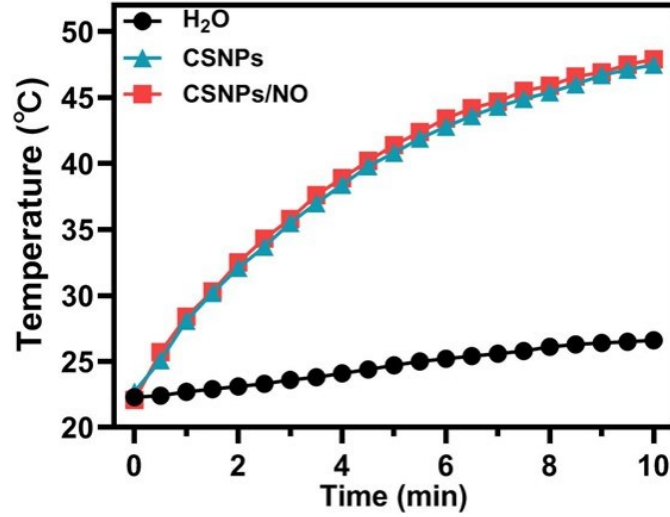

**Fig. S7** Photothermal effects of the aqueous solution of CSNPs and CSNPs/NO at the same concentration (200 µg/mL) under 1064 nm laser irradiation (1.0 W/cm<sup>2</sup>) for 10 min; pure water was used as a negative control.

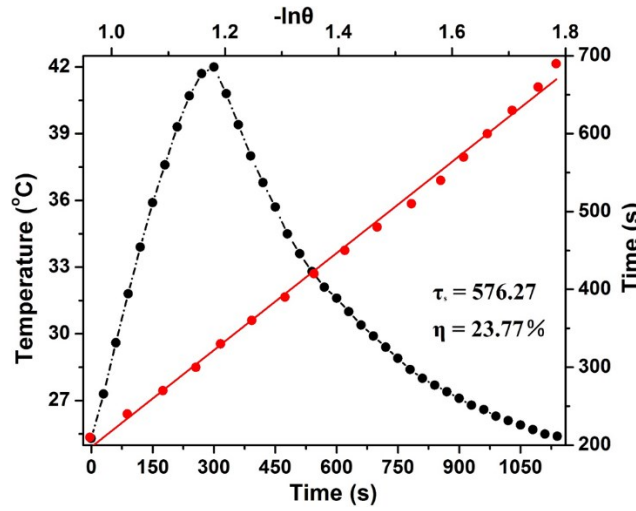

**Fig. S8** Calculation of the photothermal-conversion efficiency value of CSNPs/NO under 1064 nm laser irradiation.

The photothermal conversion efficiency ( $\eta$ ) was calculated according to the eq. 1:

$$\eta = \frac{hS(T_{max} - T_{surr}) - Q_0}{I(1 - 10^{-A})} \quad (1)$$

Where  $h$  is the heat transfer coefficient,  $S$  is the surface area of the container,  $T_{max}$  is the steady state maximum temperature,  $T_{surr}$  is the ambient temperature of the surroundings,  $Q_0$  is the baseline energy input by the solvent,  $I$  is the laser power, and  $A$  is the absorbance of CSNPs/NO solution at 1064 nm. The value of  $hS$  is calculated by eq. 2:

$$hS = \frac{m_d C_d}{\tau_s} \quad (2)$$

Where  $\tau_s$  is the characteristic thermal time constant (Fig. S7), the mass of the  $m_d$  and

$C_d$  are the mass and heat capacity of water, respectively. The heat energy( $Q_0$ ) of the sample container and solvent without CSNPs/NO were measured independently using the eq. 3:

$$Q_0 = hS(T_{max} - T_{surr}) \quad (3)$$

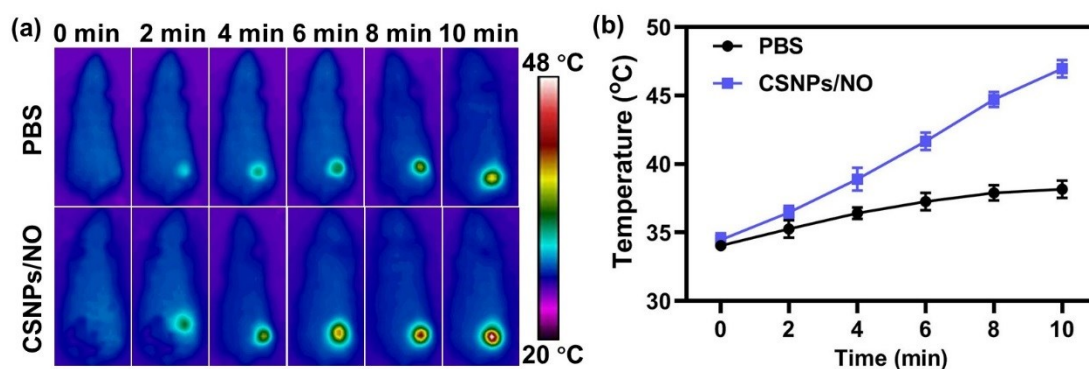

**Fig. S9** IR thermal images (a) and the corresponding temperature change curves (b) of tumor-bearing mice after intravenous injection by PBS or CSNPs/NO under 1064 nm laser irradiation with a power density of 1 W cm<sup>-2</sup>.

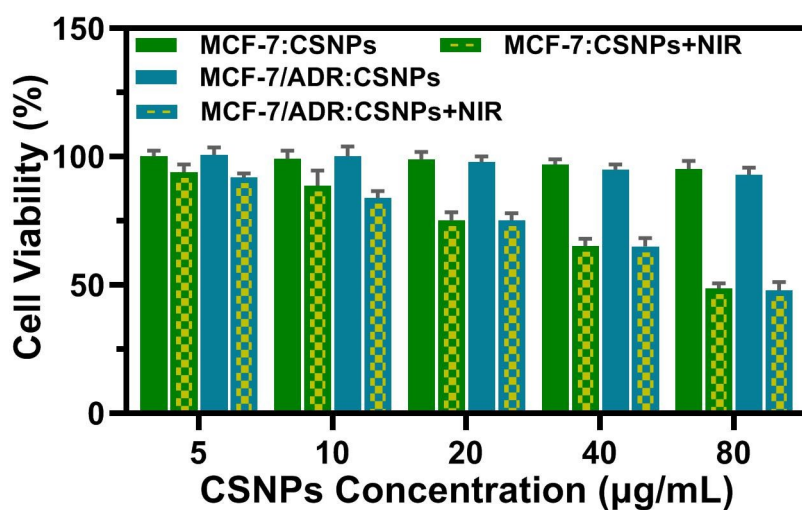

**Fig. S10** Cytotoxicity of CSNPs incubated with MCF-7 and MCF-7/ADR cells and adding with or without 1064 nm laser irradiation.



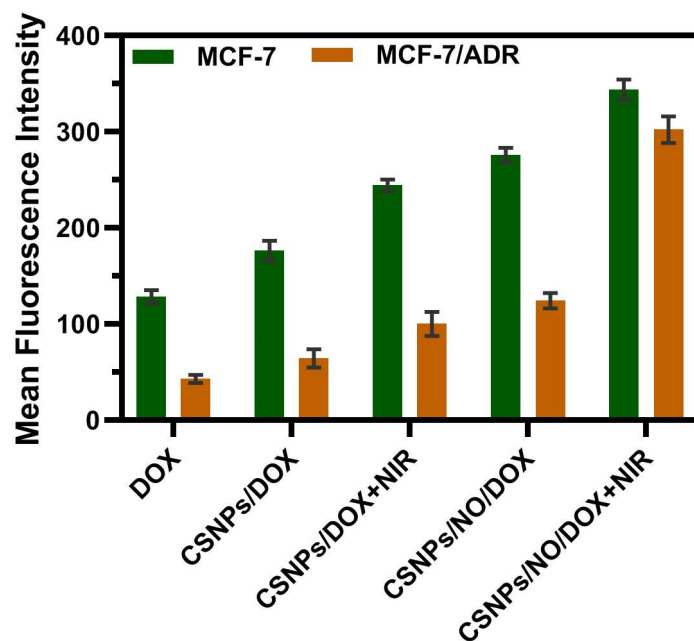

**Fig. S11** Flow cytometry quantitative analysis of cellular uptake of DOX in MCF-7 cells and MCF-7/ADR cells after treated with free DOX, CSNPs/DOX, CSNPs/DOX+NIR, CSNPs/NO/DOX, and CSNPs/NO/DOX+NIR for 4h incubation (1064 nm laser, 1.0 W cm<sup>-2</sup> for 10 min).

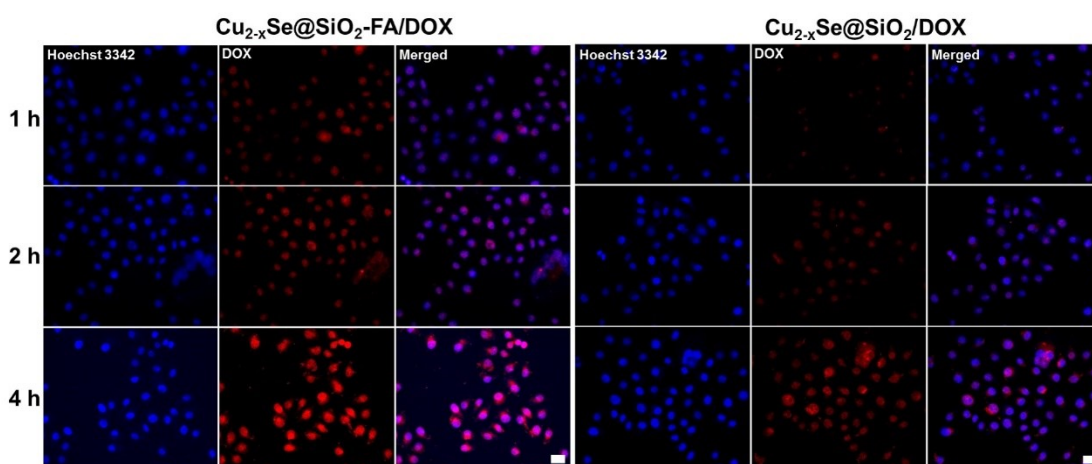

**Fig. S12** CLSM images of Cu<sub>2-x</sub>Se@SiO<sub>2</sub>-FA/DOX (CSNPs/DOX) and Cu<sub>2-x</sub>Se@SiO<sub>2</sub>/DOX (CSNPs/DOX-FA) uptake by MCF-7/ADR cells for 1 h, 2 h and 4 h. Scale bar = 20 μm

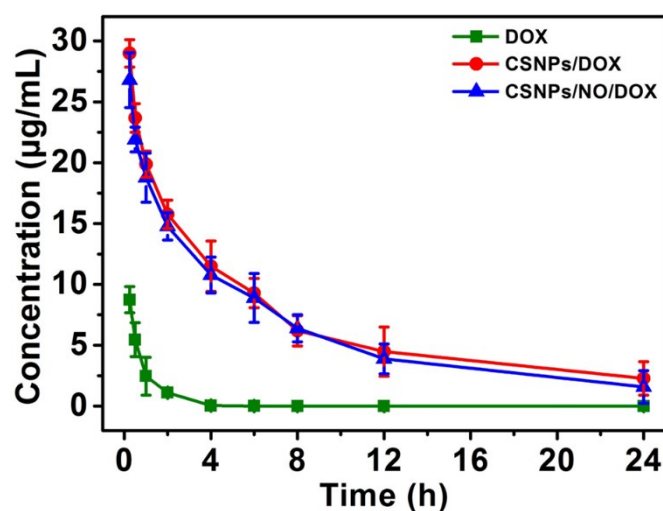

**Fig. S13** Representative plasma concentration-time profiles of free DOX, CSNPs/DOX and CSNPs/NO/DOX after i.v. injection into rats. The data are presented as the average  $\pm$  standard error ( $n = 4$ ).

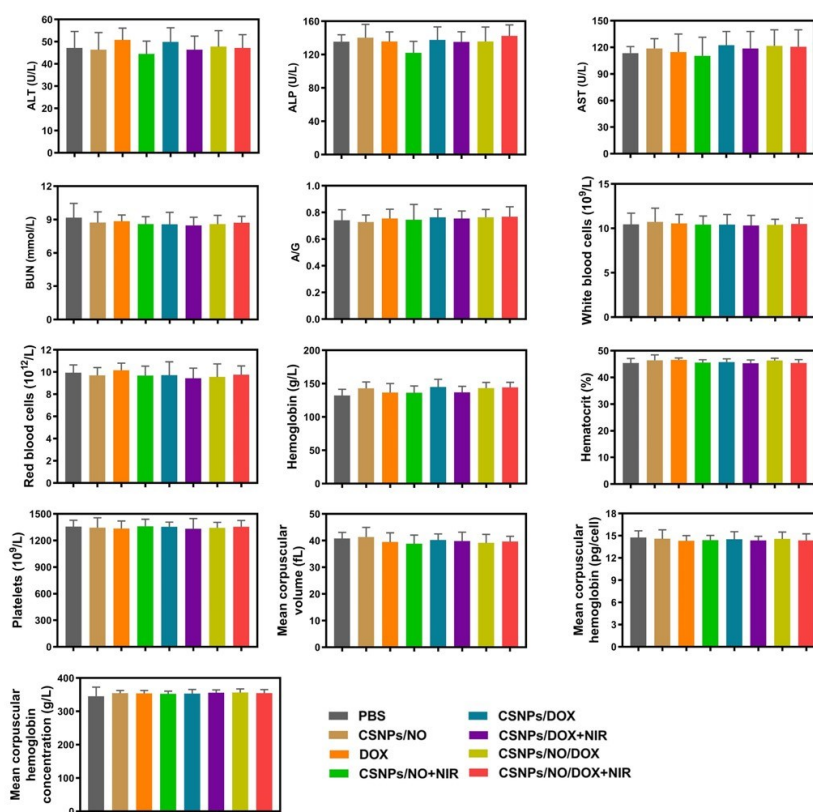

**Fig. S14** Blood analysis data of mice 30 days after the different treatments. These findings did not indicate a trend of toxicity. ALT = alanine aminotransferase; AST = aspartate aminotransferase; ALP = alkaline phosphatase; TP = total bilirubin; BUN = blood urea nitrogen.

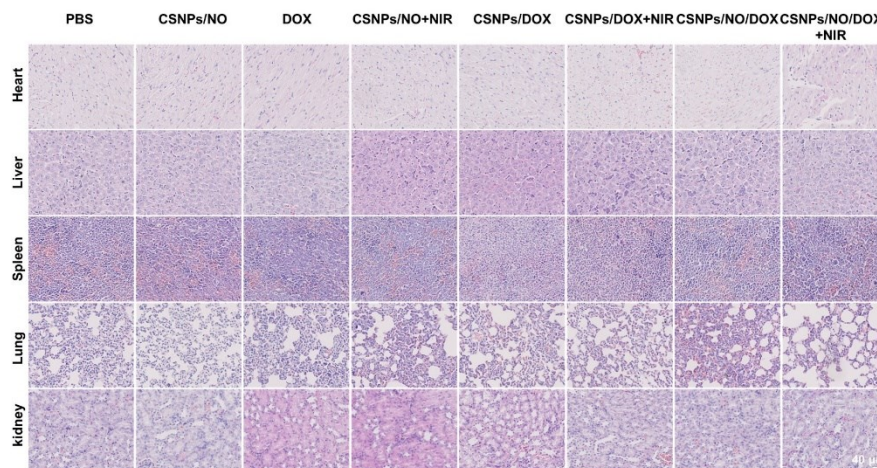

**Fig. S15** H&E staining assay of normal organs obtained at the end of tumor therapeutic experiments. The organs were harvested from MCF-7/ADR tumor-bearing nude mice at the 30 day. Examined organs included lung, heart, kidney, spleen, and liver. No obvious organ damage was observed for the different groups.

**Table S1.** Pore size, pore volume and BET surface of CSNPs and CSNPs/NO.

| Sample   | Pore size<br>(nm) | Pore volume<br>(cm <sup>3</sup> /g) | BET surface area<br>(m <sup>2</sup> /g) |
|----------|-------------------|-------------------------------------|-----------------------------------------|
| CSNPs    | 2.77              | 0.85                                | 273                                     |
| CSNPS/NO | 2.57              | 0.81                                | 256                                     |

**Table S2.** Hydrodynamic size of CSNPs/NO measured in PBS (pH 7.4), cell culture media DMEM without FBS and DMEM supplemented with 10% FBS.

| CSNPs/NO                     | PBS        | DMEM       | DMEM 10% FBS |
|------------------------------|------------|------------|--------------|
| Hydrodynamic size [nm] (PDI) | 133 (0.17) | 141 (0.18) | 152 (0.15)   |
